# Supplementary material for: Synthesis of Water-Dispersed Sulfobetaine Methacrylate–Iron Oxide Nanoparticle-Coated Graphene Composite by Free Radical Polymerization
Source: MDPI journal article supplement (doi:10.3390/polym14183885), 2022-09-17
Supplement: s1 [file s1]

## ***Supplementary Materials***

### **Synthesis of Water-Dispersed Sulfobetaine Methacrylate-Iron Oxide Nanoparticles Coated Graphene Composite by Free Radical Polymerization**

Suguna Perumal <sup>1,2,\*†</sup>, Raji Atchudan <sup>2,3,†</sup>, Yong Rok Lee <sup>2,\*</sup>

<sup>1</sup> *Department of Chemistry, Sejong University, Seoul 143-747, Republic of Korea*

<sup>2</sup> *School of Chemical Engineering, Yeungnam University, Gyeongsan, Gyeongsangbuk-do 38541, Republic of Korea.*

<sup>3</sup> *Department of Chemistry, Saveetha School of Engineering, Saveetha Institute of Medical and Technical Sciences, Chennai-602105, Tamil Nadu, India*

\* Correspondence: suguna.perumal@gmail.com (S.P.); yrlee@yu.ac.kr (Y.R.L.)

† These authors contributed equally to this work

### Poly[2-(Methacryloyloxy)ethyl]dimethyl-(3-sulfopropyl)ammonium hydroxide] composite

The preparation of poly[2-(Methacryloyloxy)ethyl]dimethyl-(3-sulfopropyl)ammonium hydroxide] composite (PSB) was prepared as shown in **Scheme 1**. Monomer SB (500 mg, 1.78 mmol) and ACVA (25.0 mg, 0.089 mmol) in 70 mL of DI water were heated at 70 °C for 6 h in a sonication bath. Then the composite PSB was purified by dialysis in DI water using 3K cellulose membrane for 3 days, the water was replaced twice a day. After dialysis, the solution was dried in a freeze dryer that yielded white powder of PSB. The prepared PSB was characterized using size-exclusion chromatography (SEC) (Waters, Alliance e2695 with Waters 2414 Refractive index detector) and thermogravimetric analysis. The molecular number of PSB was measured as 24536 g/mol with PD value as 1.8 using SEC.

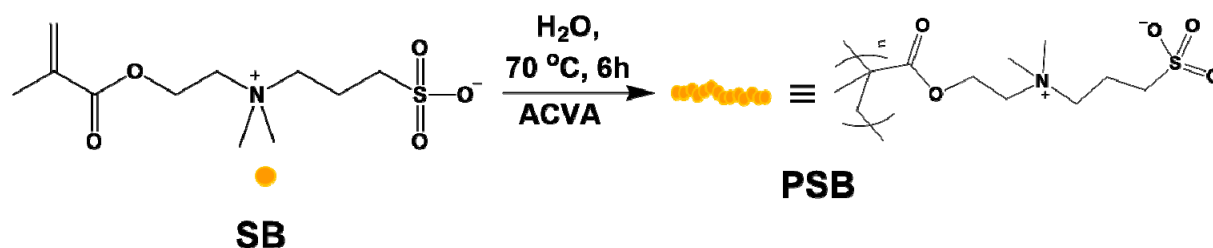

**Scheme 1.** Synthesis of poly[2-(Methacryloyloxy)ethyl]dimethyl-(3-sulfopropyl)ammonium hydroxide].

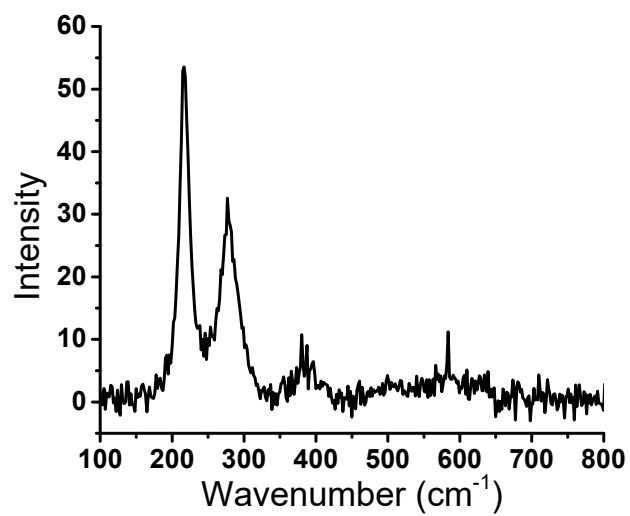

**Figure S1.** Raman spectrum of IONPs.

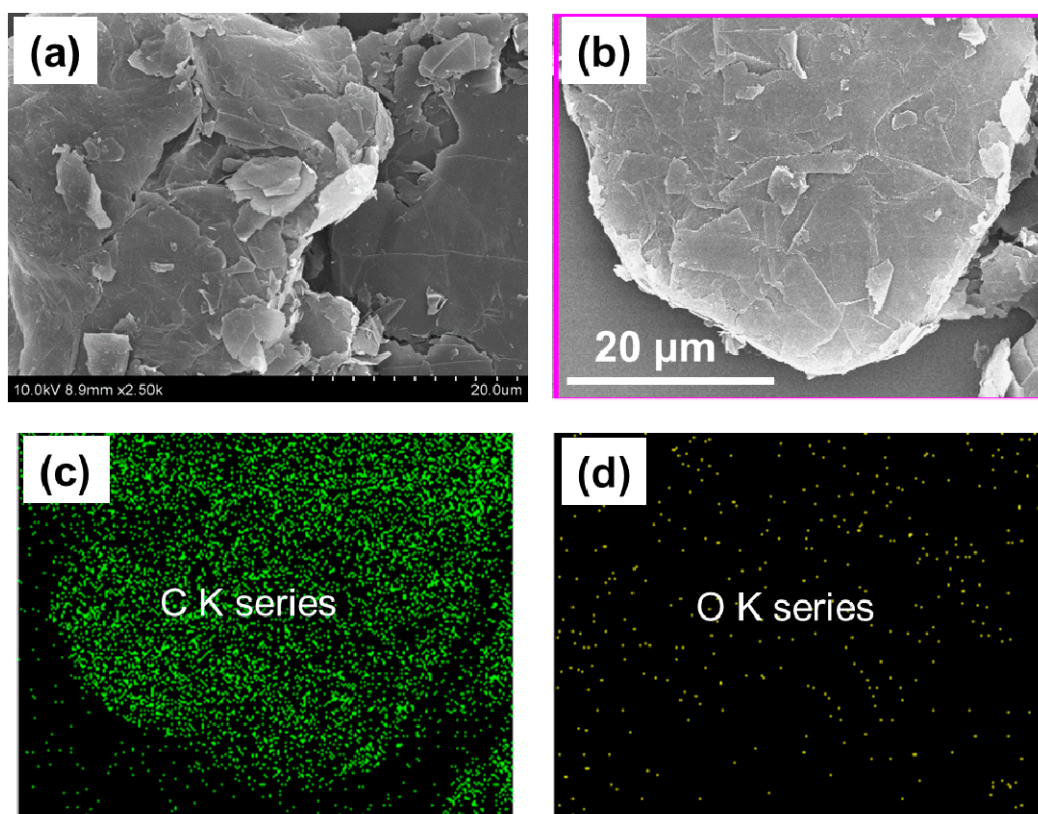

**Figure S2.** FESEM images of G (a and b). Elemental image of G (c) C K series, (d) O K series.

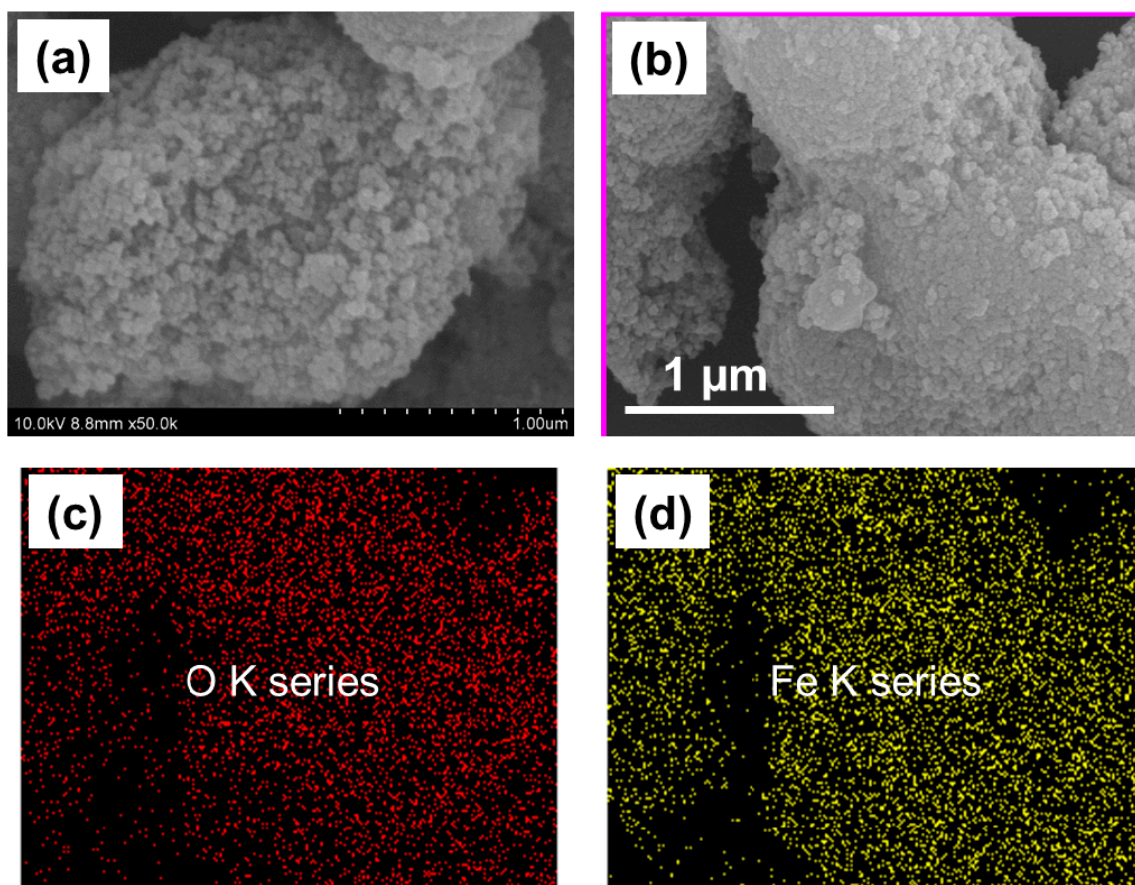

**Figure S3.** FESEM images of IONPs (a and b) and their elemental image (c) O K series, (d) Fe K series.

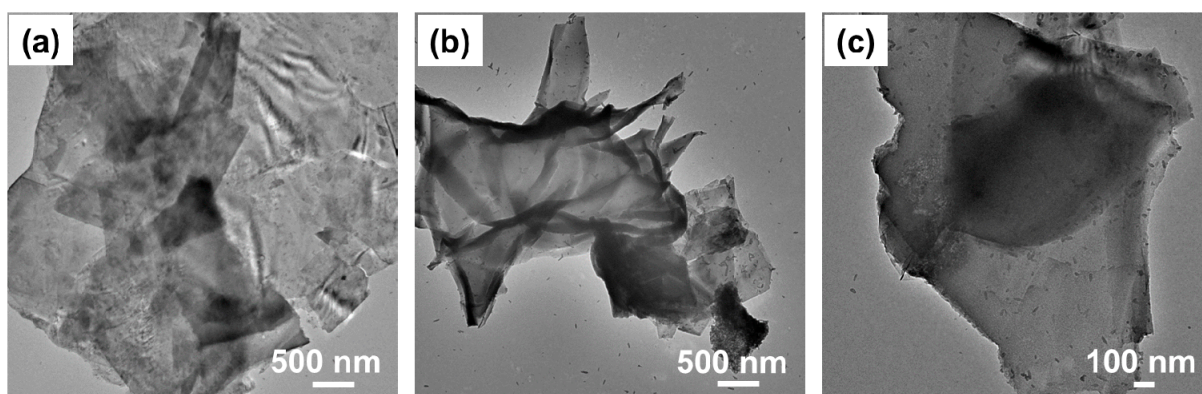

**Figure S4.** TEM images of G with different magnifications.

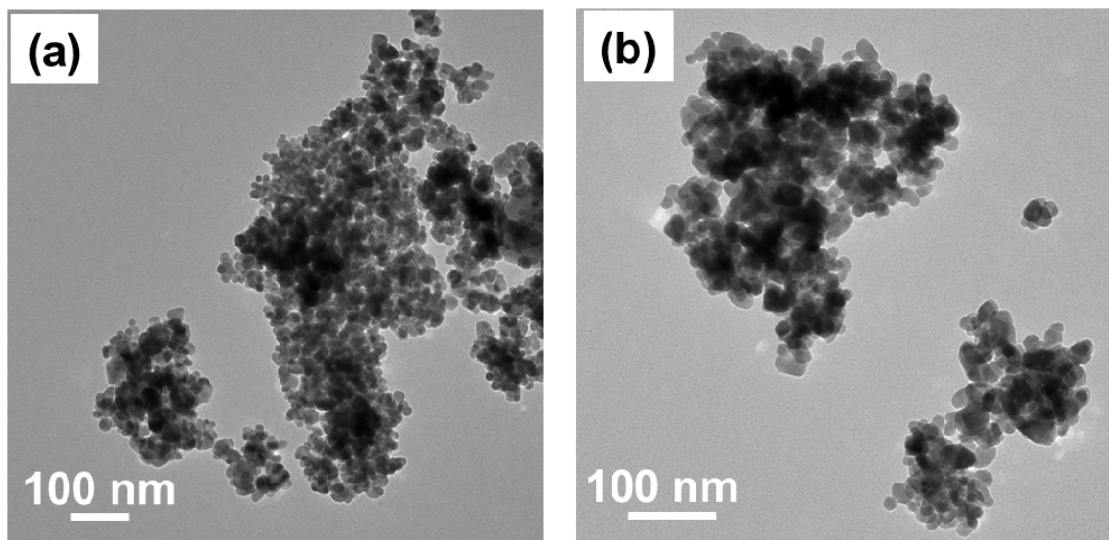

**Figure S5.** TEM images of IONPs (a and b).

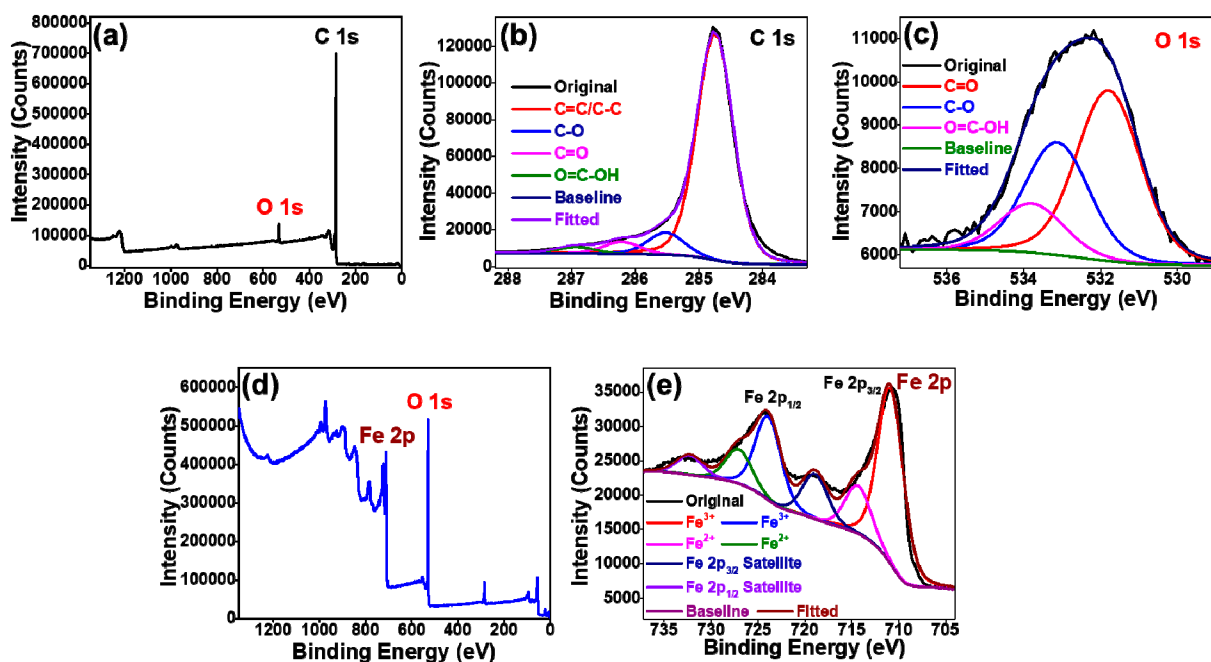

**Figure S6.** XPS spectra of G (a) survey spectra, (b) C 1s, and (c) O 1s. XPS spectra of IONPs (d) survey spectrum and (e) Fe 2p.
